# Supplementary material
Source: bioRxiv or medRxiv preprint supplement (https://medrxiv.org/highwire/filestream/93952/field_highwire_adjunct_files/0/2020.08.20.20176529-1.pdf)
Supplement: Supplementary file [file 2020.08.20.20176529-1.pdf]

- 1 Supplementary material 1: Survey to capture views on isolation
- 2 outside the home
- 3 Feedback on a website to help people protect themselves from Coronavirus at
- 4 home: Can you help?

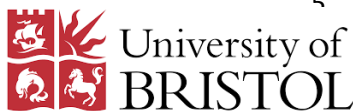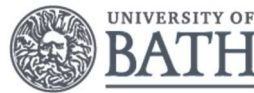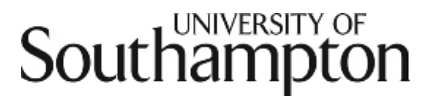

7

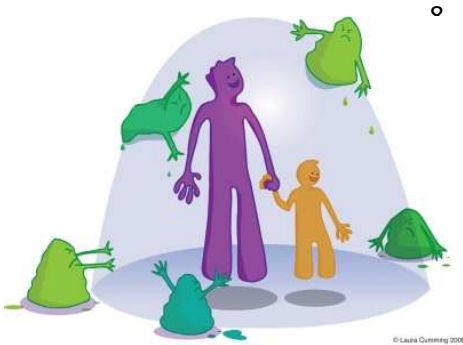

13 *<Front page will contain full participant information sheet, and second page include*

14 *consent form>*

- 15 1. What did you think was good about the Germ Defence advice?
- 16 (open text box, word limit 500 words?)
- 17 2. What did you not like about the Germ Defence advice?
- 18 (open text box, word limit 500 words?)
- 19 3. How do you feel about following the suggestions on Germ Defence advice?
- 20 (open text box, word limit 500 words?)
- 21 4. How could the Germ Defence advice be improved?
- 22 (open text box, word limit 500 words?)
- 23 5. If you, or anyone in your household has symptoms, self-isolation is recommended (this means
- 24 staying on your own in your room with the door closed, only coming out when necessary (e.g.

25 to use the bathroom or prepare food). Should this happen, what (if anything) would make it  
26 difficult for you to self-isolate at home?

27 (open text box, word limit 500 words)

28 6. In some countries people with coronavirus or people who are at higher risk if they catch  
29 coronavirus are offered accommodation to self-isolate outside their own home. This is done  
30 so that coronavirus does not spread to other household members, especially if they are at  
31 higher risk.

32 How likely would you be to accept an offer of accommodation for you to self-isolate away  
33 from your home while you were ill? (for example, in an unused student flat)

34 [Single choice]

- 35 a) I would accept
- 36 b) I probably would accept
- 37 c) I might accept
- 38 d) I definitely would not accept

39 6.1. Why?

40 *Additional questions may be added to explore specific issues as they emerge.*

41 We'd also like a little bit of information about you. This is so we can make sure the website  
42 can help everyone who needs it.

43 We apologise for asking you to complete these questions again. This survey is anonymous so  
44 we can't link your answers to the information you already gave us on the Germ Defence  
45 website.

46 7. How old are you?

- 47 - 18 to 25
- 48 - 26 to 40
- 49 - 41 to 60
- 50 - 61 to 70

51 - Over 70

52 8. What is your experience with COVID-19 (the coronavirus)?

53 - I think I have had the virus

54 - I think someone I live with has had the virus

55 - I am at increased risk if I get the virus

56 - Someone I live with is at increased risk if they get the virus

57 - None of the above

58 - Other (Please write more details if possible)

59 9. If possible, please give us a little more information about your experience with

60 COVID-19.

61 10. When did you leave full time education? (if you are still in education, please select the  
62 stage you are at now)

63 - Before finishing school

64 - After finishing school

65 - After finishing university

66 - After postgraduate studies

67 *Other demographic questions may be added as needed to inform current research*

68 Thank you very much!

69 We cannot act on all the suggestions we receive, but we will read everything you tell us and  
70 use this information to help make Germ Defence as useful as possible.

71 Please click the submit button below to send your answers.

72 **Back**

**Submit**

73
